# Supplementary material
Source: PubMed Central journal article supplement (PMC4914653)
Supplement: AAC.00365-16_zac007165303so1.pdf [file AAC.00365-16_zac007165303so1.pdf]

## **Supplementary material index.**

- Supplementary Figure S1. Flow chart of included patients.
- Supplementary Table S1. Checklist of items according to STROBE document.
- Supplementary Table S2. Univariate analysis of the association between different variables and cure/improvement in the Empirical Therapy Cohort.
- Supplementary Table S3. Univariate analysis of the association between different variables and 30-day mortality in the Empirical Therapy Cohort.
- Supplementary Table S4. Number of BLBLI/carbapenem cases in the Empirical Therapy Cohort included according the center, country and region.
- Supplementary Figure S2. Meta-regression analysis of mortality at Day 30 grouping by regions in the Empirical Therapy Cohort.
- Supplementary Table S5. Features of patients matched according to the propensity score from the Empirical Therapy Cohort.
- Supplementary Figure S3. Kaplan-Meier curves for mortality in empirical therapy propensity score-matched cohorts of patients treated with BLBLI versus carbapenems.
- Supplementary Table S6. Univariate analysis of the association between different variables and cure/improvement in the Targeted Therapy Cohort.
- Supplementary Table S7. Univariate analysis of the association between different variables and 30-day mortality in the Targeted Therapy Cohort.
- Supplementary Table S8. Number of BLBLI/carbapenem cases in the Targeted Therapy Cohort included according the center, country and region.
- Supplementary Figure S4. Meta-regression analysis of mortality at Day 30 grouping by regions in the Targeted Therapy Cohort.
- Supplementary Table S9. Features of patients matched according to the propensity score from the Targeted Therapy Cohort.
- Supplementary Figure S5. Kaplan-Meier curves for mortality in targeted therapy propensity score-matched cohorts of patients treated with BLBLI versus carbapenems.
- Supplementary Table S10. Univariate analysis of the association between different variables and cure/improvement in the Global Therapy Cohort.

- Supplementary Table S11. Univariate analysis of the association between different variables and 30-day mortality in the Global Therapy Cohort.

Supplementary Figure S1. Flow chart of included patients.

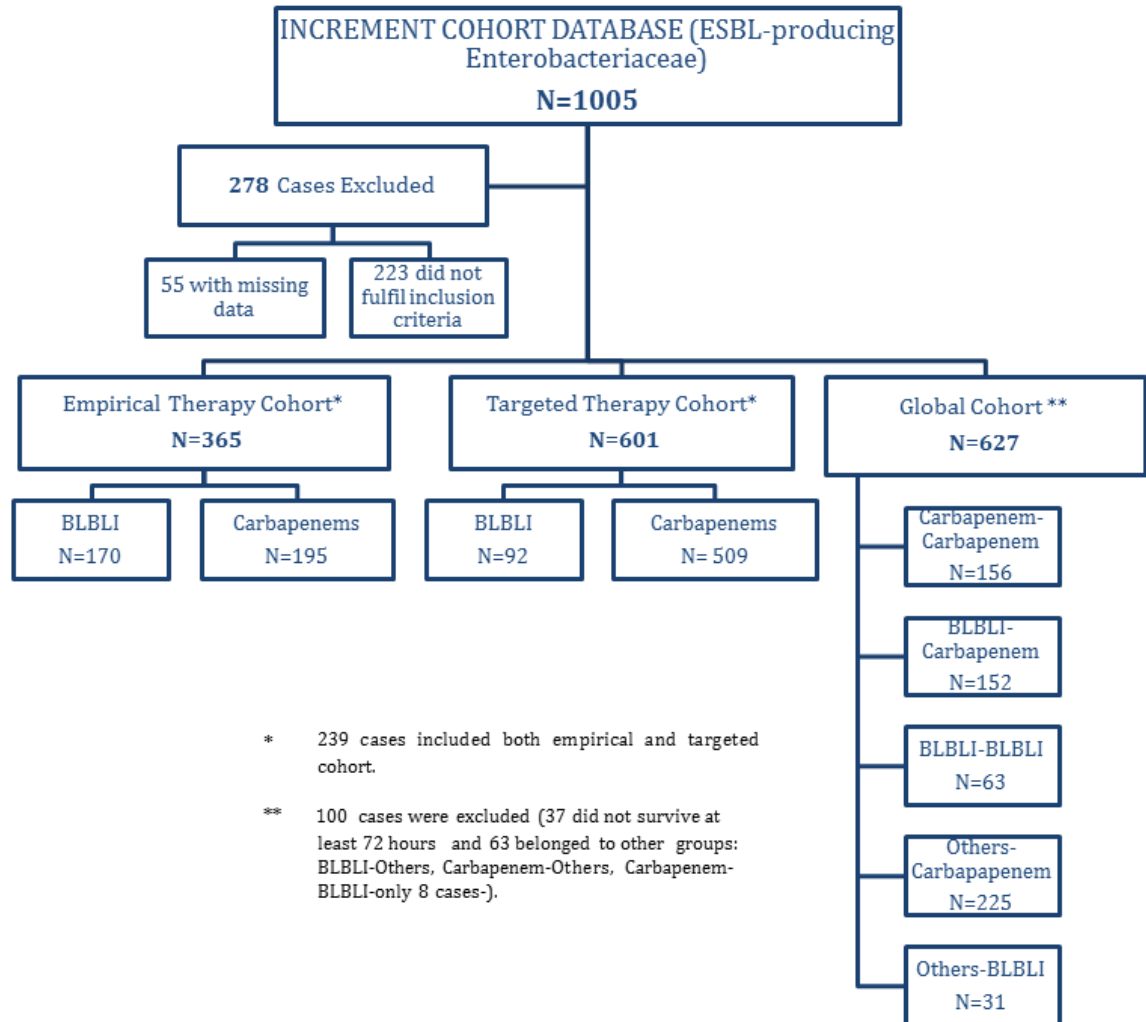

Supplementary Table S1. Checklist of items according to STROBE document.

|                              | <b>Recommendation</b>                                                                                                                                                                | <b>Assessment in article</b>                                                                                                                                                  |
|------------------------------|--------------------------------------------------------------------------------------------------------------------------------------------------------------------------------------|-------------------------------------------------------------------------------------------------------------------------------------------------------------------------------|
| Title and abstract           | (a) Indicate the study design with a commonly used term in the title or abstract                                                                                                     | Study design specified in title and abstract                                                                                                                                  |
|                              | (b) Provide an informative and balanced summary in the abstract of what was done and what was found                                                                                  | Balanced summary included in the abstract                                                                                                                                     |
| Background/<br>Rationale     | Explain the scientific background and rationale for the investigation being reported                                                                                                 | The scientific background and rationale is included in the Introduction                                                                                                       |
| Objectives                   | State specific objectives, including any pre-specified hypotheses                                                                                                                    | Pre-specified hypothesis and objectives are stated in the Introduction                                                                                                        |
| Study design                 | Present key elements of study design early in the paper                                                                                                                              | Study design described in the first part of Methods                                                                                                                           |
| Setting                      | Describe the setting, locations, and relevant dates, including periods of recruitment, exposure, follow-up, and data collection                                                      | Described in Methods                                                                                                                                                          |
| Participants                 | (a) Give the eligibility criteria and the sources and methods of selection of participants. Describe methods of follow-up                                                            | Described in Methods                                                                                                                                                          |
|                              | (b) For matched studies, give matching criteria and number of exposed and unexposed                                                                                                  | This is not a matched study                                                                                                                                                   |
| Variables                    | Clearly define all outcomes, exposures, predictors, potential confounders and effect modifiers. Give diagnostic criteria, if applicable                                              | Defined in Methods                                                                                                                                                            |
| Data sources/<br>measurement | For each variable of interest, give sources of data and details of methods of assessment (measurement). Describe comparability of assessment methods if there is more than one group | Specified in Methods. The same methods for data collection of data were used in the groups.                                                                                   |
| Bias                         | Describe any efforts to address potential sources of bias                                                                                                                            | Selection bias: inclusion of consecutive cases. Information bias: use of well defined, standard, easy to collect variables (piloted). Use of soft and hard outcome variables. |
| Study size                   | Explain how the study size was arrived at                                                                                                                                            | The attempted sample size was specified in Methods                                                                                                                            |
| Quantitative variables       | Explain how quantitative variables were handled in the analyses. If applicable, describe which groupings were chosen and why                                                         | Quantitative variables were handled as such. No groupings were made                                                                                                           |

|                     |                                                                                                                                                                                                              |                                                                                    |
|---------------------|--------------------------------------------------------------------------------------------------------------------------------------------------------------------------------------------------------------|------------------------------------------------------------------------------------|
| Statistical methods | (a) Describe all statistical methods, including those used to control for confounding                                                                                                                        | Included in Methods                                                                |
|                     | (b) Describe any methods used to examine subgroups and interactions                                                                                                                                          | Included in Methods                                                                |
|                     | (c) Explain how missing data were addressed                                                                                                                                                                  | Patients with missing data were excluded                                           |
|                     | (d) If applicable, explain how loss to follow-up was addressed                                                                                                                                               | No patient was lost to follow-up                                                   |
|                     | (e) Describe any sensitivity analyses                                                                                                                                                                        | Included in Methods                                                                |
| Participants        | (a) Report numbers of individuals at each stage of study—eg numbers potentially eligible, examined for eligibility, confirmed eligible, included in the study, completing follow-up, and analysed            | Included in Results (Supplementary Figure 1)                                       |
|                     | (b) Give reasons for non-participation at each stage                                                                                                                                                         | Specified in Supplementary Figure 1                                                |
|                     | (c) Consider use of a flow diagram                                                                                                                                                                           | Supplementary Figure 1                                                             |
| Descriptive data    | (a) Give characteristics of study participants (eg demographic, clinical, social) and information on exposures and potential confounders                                                                     | Table 1                                                                            |
|                     | (b) Indicate number of participants with missing data for each variable of interest                                                                                                                          | Supplementary Figure 1                                                             |
|                     | (c) Summarise follow-up time (eg, average and total amount)                                                                                                                                                  | Information for 30 days was available from all patients                            |
| Outcome data        | Report numbers of outcome events or summary measures over time                                                                                                                                               | Table 1                                                                            |
| Main results        | (a) Give unadjusted estimates and, if applicable, confounder-adjusted estimates and their precision (eg, 95% confidence interval). Make clear which confounders were adjusted for and why they were included | Specified in Results (Tables 2, 3; Supplementary Tables 2, 3, 4, 5, 6, 7, 8 and 9) |
|                     | (b) Report category boundaries when continuous variables were categorized                                                                                                                                    | Continuous variables were not categorized                                          |
|                     | (c) If relevant, consider translating estimates of relative risk into absolute risk for a meaningful time period                                                                                             | Not applicable                                                                     |
| Other analyses      | Report other analyses done—e.g. analyses of subgroups and interactions, and sensitivity analyses                                                                                                             | Specified in Results                                                               |
| Key results         | Summarise key results with reference to study objectives                                                                                                                                                     | Specified in Abstract and Discussion                                               |
| Limitations         | Discuss limitations of the study, taking into account sources of potential bias or imprecision. Discuss both direction and magnitude of any potential bias                                                   | Included in Discussion                                                             |
| Interpretation      | Give a cautious overall interpretation of results considering objectives, limitations, multiplicity of analyses, results from similar studies, and other relevant evidence                                   | Included in Discussion                                                             |

|                  |                                                                                                                                                               |                        |
|------------------|---------------------------------------------------------------------------------------------------------------------------------------------------------------|------------------------|
| Generalisability | Discuss the generalisability (external validity) of the study results                                                                                         | Included in Discussion |
| Funding          | Give the source of funding and the role of the funders for the present study and, if applicable, for the original study on which the present article is based | Included               |

Supplementary Table S2. Univariate analysis of the association between different variables and cure/improvement in the Empirical Therapy Cohort.

| Variable                         | Crude Analysis    |         |
|----------------------------------|-------------------|---------|
|                                  | OR (95% CI)       | p       |
| Age (per unit)                   | 0.99 (0.97-1.005) | 0.17    |
| Male sex                         | 1.04 (0.62-1.74)  | 0.88    |
| Enterobacteriaceae               |                   |         |
| <i>E. coli</i>                   | Reference         |         |
| <i>K. pneumoniae</i>             | 0.55 (0.31-0.99)  | 0.044   |
| <i>Others</i>                    | 2.20 (0.61- 14.1) | 0.30    |
| Nosocomial acquisition           | 0.48 (0.28- 0.80) | 0.005   |
| Source                           |                   |         |
| Urinary                          | Reference         |         |
| Biliary tract                    | 0.9 (0.38- 2.42)  | 0.83    |
| <i>Others (high risk source)</i> | 0.33 (0.19-0.58)  | 0.0002  |
| ICU admission                    | 0.53 (0.26-1.15)  | 0.10    |
| McCabe classification, non fatal | 3.15 (1.82-5.66)  | <0.0001 |
| Pitt score (per unit)            | 0.70 (0.62-0.78)  | <0.0001 |
| Severe sepsis or shock           | 0.13 (0.07-0.23)  | <0.0001 |
| Empirical therapy with BLBLI     | 1.06 (0.64-1.78)  | 0.81    |
| Targeted therapy                 |                   |         |
| Carbapenems                      | Reference         |         |
| <i>Others</i>                    | 0.85 (0.5-1.47)   | 0.55    |
| Propensity score*                | 1.13 (0.41-3.16)  | 0.81    |

\*Variables used for calculating the propensity score: center, age, gender, underlying conditions, McCabe, acquisition type, source, Pitt score, and presentation with severe sepsis or septic shock. The area under the ROC curve for the propensity score was 0.80.

Supplementary Table S3. Univariate analysis of the association between different variables and 30-day mortality in the Empirical Therapy Cohort.

| Variable                         | Crude Analysis     |         |
|----------------------------------|--------------------|---------|
|                                  | OR (95% CI)        | p       |
| Age (per unit)                   | 1.025 (1.01-1.04)  | 0.008   |
| Male sex                         | 1.24 (0.73-2.15)   | 0.43    |
| Enterobacteriaceae               |                    |         |
| <i>E. coli</i>                   | Reference          |         |
| <i>K. pneumoniae</i>             | 2.30 (1.28-4.10)   | 0.005   |
| Others                           | 0.54 (0.08- 1.97)  | 0.43    |
| Nosocomial acquisition           | 1.86 (1.1-3.18)    | 0.02    |
| Source                           |                    |         |
| Urinary                          | Reference          |         |
| Biliary tract                    | 1.03 (0.36-2.60)   | 0.95    |
| Others (high risk source)        | 3.03 (1.71-5.54)   | 0.0002  |
| ICU admission                    | 2.43 (1.15-4.97)   | 0.016   |
| McCabe classification, non fatal | 0.29 (0.15-0.51)   | <0.0001 |
| Pitt score, per unit             | 1.49 (1.33-1.68)   | <0.0001 |
| Severe sepsis or shock           | 11.82 (6.22-24.17) | <0.0001 |
| Empirical therapy with BLBLI     | 0.86 (0.5-1.45)    | 0.57    |
| Targeted therapy                 |                    |         |
| Carbapenems                      | Reference          |         |
| Others                           | 1.28(0.73-2.2)     | 0.38    |
| Propensity score*                | 0.87 (0.3-2.5)     | 0.80    |

\*Variables used for calculating the propensity score: center, age, gender, underlying conditions, acquisition type, source, Pitt score, and presentation with severe sepsis or septic shock. The area under the ROC curve for the propensity score was 0.80.



Supplementary Table S4. Number of BLBLI/carbapenem cases in the Empirical Therapy Cohort included according the center, country and region.

| <b>CENTER</b> | <b>COUNTRY</b> | <b>REGION</b>  | <b>TOTAL BLBLI</b> | <b>TOTAL CARBAPENEM</b> | <b>TOTAL</b> |
|---------------|----------------|----------------|--------------------|-------------------------|--------------|
| 2             | SPAIN          | SPAIN          | 25                 | 11                      | 36           |
| 3             | ISRAEL         | REST OF WORLD  | 3                  | 4                       | 7            |
| 4             | USA            | REST OF WORLD  | 6                  | 7                       | 13           |
| 5             | ITALY          | OTHER MEDITERR | 7                  | 0                       | 7            |
| 7             | GREECE         | OTHER MEDITERR | 1                  | 8                       | 9            |
| 9             | ITALY          | OTHER MEDITERR | 0                  | 2                       | 2            |
| 12            | SPAIN          | SPAIN          | 11                 | 13                      | 24           |
| 16            | SOUTH AFRICA   | REST OF WORLD  | 0                  | 5                       | 5            |
| 17            | TAIWAN         | REST OF WORLD  | 0                  | 2                       | 2            |
| 18            | SPAIN          | SPAIN          | 3                  | 1                       | 4            |
| 20            | SPAIN          | SPAIN          | 1                  | 15                      | 16           |
| 21            | SPAIN          | SPAIN          | 10                 | 11                      | 21           |
| 22            | SPAIN          | SPAIN          | 7                  | 0                       | 7            |
| 23            | ARGENTINA      | REST OF WORLD  | 1                  | 3                       | 4            |
| 24            | SPAIN          | SPAIN          | 8                  | 14                      | 22           |
| 25            | SPAIN          | SPAIN          | 4                  | 17                      | 21           |
| 26            | SPAIN          | SPAIN          | 2                  | 8                       | 10           |
| 27            | SPAIN          | SPAIN          | 0                  | 5                       | 5            |
| 28            | SPAIN          | SPAIN          | 4                  | 8                       | 12           |
| 31            | GREECE         | OTHER MEDITERR | 1                  | 0                       | 1            |
| 32            | CANADA         | REST OF WORLD  | 2                  | 2                       | 4            |
| 35            | SPAIN          | SPAIN          | 0                  | 5                       | 5            |
| 38            | TURKEY         | OTHER MEDITERR | 5                  | 10                      | 15           |
| 40            | GERMANY        | REST OF WORLD  | 4                  | 12                      | 16           |
| 42            | SPAIN          | SPAIN          | 6                  | 7                       | 13           |
| 43            | SPAIN          | SPAIN          | 17                 | 6                       | 23           |
| 45            | ITALY          | OTHER MEDITERR | 12                 | 7                       | 19           |
| 47            | GERMANY        | REST OF WORLD  | 6                  | 2                       | 8            |
| 49            | SPAIN          | SPAIN          | 8                  | 3                       | 11           |
| 51            | SPAIN          | SPAIN          | 16                 | 7                       | 23           |
| <b>TOTAL</b>  |                |                | <b>170</b>         | <b>195</b>              | <b>365</b>   |

Supplementary Figure S2. Meta-regression analysis of mortality at Day 30 grouping by regions in the Empirical Therapy Cohort.

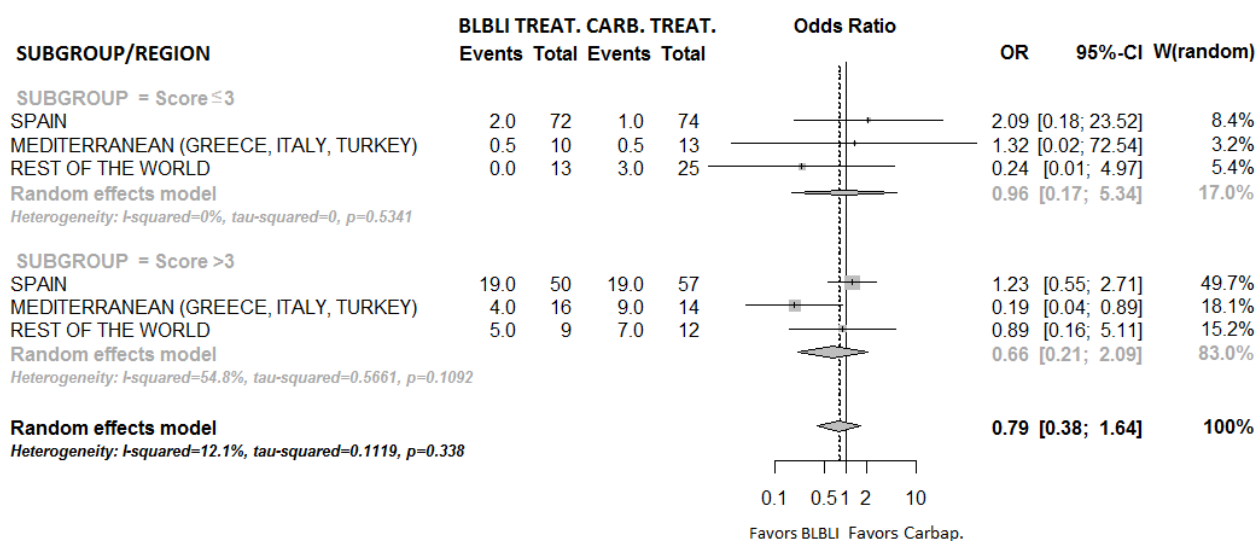

Supplementary Table S5. Features of patients matched according to the propensity score from the Empirical Therapy Cohort.

|                                  | BLBLI<br>(n=100) | Carbapenem<br>(n=100) | P       |
|----------------------------------|------------------|-----------------------|---------|
| Age, median (IQR)                | 69.5 (54.8-77.3) | 68.5 (57.8-78)        | 0.92    |
| Male sex                         | 53 (53.0)        | 57 (57)               | 0.57    |
| Enterobacteriaceae               |                  |                       |         |
| <i>E. coli</i>                   | 76 (76.0)        | 68 (68.0)             | 0.21    |
| <i>K. pneumoniae</i>             | 21 (21.0)        | 26 (26.0)             | 0.40    |
| Others                           | 3 (3.0)          | 6 (6.0)               | 0.31    |
| Nosocomial acquisition           | 47 (47.0)        | 45 (45.0)             | 0.78    |
| Source                           |                  |                       |         |
| Urinary                          | 44 (44.0)        | 50 (50.0)             | 0.40    |
| Biliary tract                    | 18 (18.0)        | 12 (12.0)             | 0.23    |
| Others (high risk source)        | 38 (38.0)        | 38 (38.0)             | 1.00    |
| ICU admission                    | 9 (9.0)          | 6 (6.0)               | 0.43    |
| McCabe classification, non fatal | 45 (45.0)        | 45 (45.0)             | 1.00    |
| Pitt score, median (IQR)         | 1 (0-3)          | 1 (0-3)               | 0.86    |
| Severe sepsis or shock           | 41 (41.0)        | 41 (41.0)             | 1.00    |
| Cancer                           | 38 (38.0)        | 36 (36.0)             | 0.77    |
| Targeted therapy                 |                  |                       |         |
| Carbapenem                       | 52 (52.0)        | 85 (85.0)             | <0.0001 |
| BLBLI                            | 34 (34.0)        | 3 (3.0)               | <0.0001 |
| Others                           | 14 (14.0)        | 12 (12.0)             | 0.67    |
| Cure/improvement                 | 78 (78.0)        | 77 (77.0)             | 0.87    |
| 30-day mortality                 | 17 (17.0)        | 23 (23.0)             | 0.29    |

Supplementary Figure S3. Kaplan-Meier curves for mortality in empirical therapy propensity score-matched cohorts of patients treated with BLBLI versus carbapenems.

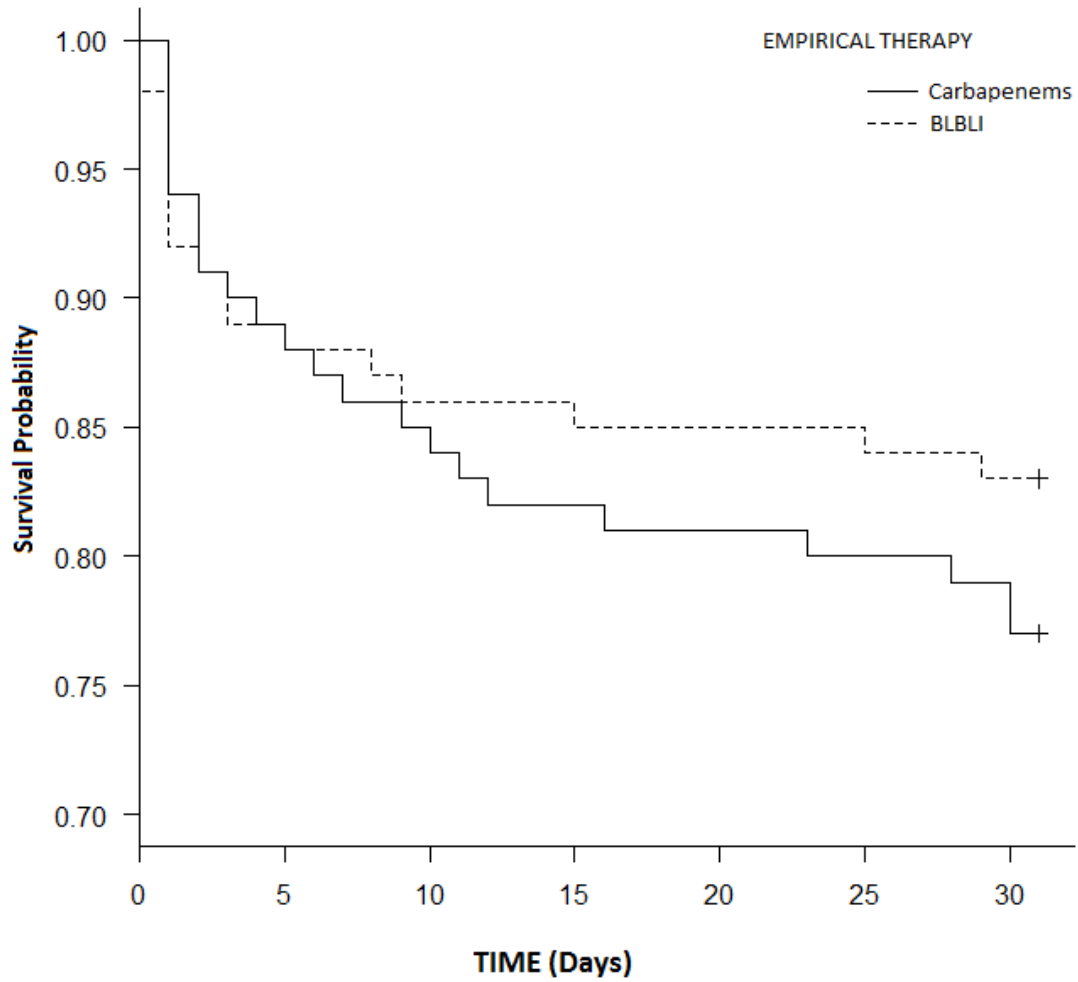

P= 0.33 (log-rank test)

Supplementary Table S6. Univariate analysis of the association between different variables and cure/improvement in the Targeted Therapy Cohort.

| Variable                                        | Crude Analysis   |         |
|-------------------------------------------------|------------------|---------|
|                                                 | OR (95% CI)      | p       |
| Age (per unit)                                  | 0.99 (0.98-1.01) | 0.83    |
| Male sex                                        | 1.14 (0.71-1.82) | 0.58    |
| Enterobacteriaceae                              |                  |         |
| <i>E. coli</i>                                  | Reference        |         |
| <i>K. pneumoniae</i>                            | 0.45 (0.26-0.77) | 0.003   |
| <i>Others</i>                                   | 0.54 (0.25-1.25) | 0.12    |
| Nosocomial acquisition                          | 0.62 (0.39-0.99) | 0.05    |
| Source                                          |                  |         |
| Urinary                                         | Reference        |         |
| Biliary tract                                   | 0.82 (0.35-2.14) | 0.66    |
| Others (high risk source)                       | 0.33 (0.19-0.55) | <0.0001 |
| ICU admission                                   | 0.3 (0.17-0.55)  | <0.0001 |
| McCabe classification, non fatal                | 3.92 (2.33-6.84) | <0.0001 |
| Pitt score, per unit                            | 0.73 (0.66-0.80) | <0.0001 |
| Severe sepsis or shock                          | 0.18 (0.11-0.30) | <0.0001 |
| Empirical therapy                               |                  |         |
| Active                                          | Reference        |         |
| Inactive/no drug                                | 0.74(0.46-1.20)  | 0.22    |
| Empirical therapy continued as targeted therapy | 1.08 (0.64-1.91) | 0.76    |
| Targeted therapy with BLBLI                     | 1.57 (0.79-3.47) | 0.23    |
| Propensity score*                               | 1.56 (0.57-4.9)  | 0.41    |

\*Variables used for calculating the propensity score: center, age, gender, underlying conditions, McCabe, acquisition type, source, Pitt score, presentation with severe sepsis or septic shock, and empirical treatment. The area under the ROC curve for the propensity score was 0.84.

Supplementary Table S7. Univariate analysis of the association between different variables and 30-day mortality in the Targeted Therapy Cohort.

| Variable                                        | Crude Analysis   |         |
|-------------------------------------------------|------------------|---------|
|                                                 | OR (95% CI)      | p       |
| Age (per unit)                                  | 1.02 (1.00-1.04) | 0.018   |
| Male sex                                        | 1.15 (0.72-1.89) | 0.56    |
| Enterobacteriaceae                              |                  |         |
| <i>E. coli</i>                                  | Reference        |         |
| <i>K. pneumoniae</i>                            | 2.58 (1.50-4.39) | 0.0005  |
| <i>Others</i>                                   | 2.02 (0.87-4.28) | 0.08    |
| Nosocomial acquisition                          | 1.31 (0.82-2.11) | 0.26    |
| Source                                          |                  |         |
| Urinary                                         | Reference        |         |
| Biliary tract                                   | 1.03 (0.37-2.51) | 0.95    |
| Others (high risk source)                       | 2.88 (1.71-4.99) | <0.0001 |
| ICU admission                                   | 3.5 (1.91-6.28)  | <0.0001 |
| McCabe classification, non fatal                | 0.23 (0.13-0.40) | <0.0001 |
| Pitt score, per unit                            | 1.38 (1.26-1.51) | <0.0001 |
| Severe sepsis or shock                          | 5.70 (3.46-9.64) | <0.0001 |
| Empirical therapy continued as targeted therapy | 0.83 (0.46-1.43) | 0.31    |
| Empirical Therapy                               |                  |         |
| Active                                          | Ref              |         |
| No active/no empirical therapy                  | 1.56 (0.97-2.51) | 0.07    |
| Targeted Therapy with BLBLI                     | 0.67 (0.30-1.32) | 0.28    |
| Propensity score*                               | 0.75 (0.24-2.01) | 0.59    |

\*Variables used for calculating the propensity score: center, age, gender, underlying conditions, McCabe, acquisition type, source, Pitt score, presentation with severe sepsis or septic shock, and empirical treatment. The area under the ROC curve for the propensity score was 0.84.

Supplementary Table S8. Number of BLBLI/carbapenem cases in the Targeted Therapy Cohort included according the center, country and region.

| CENTER | COUNTRY      | REGION         | TOTAL BLBLI | TOTAL CARBAPENEM | TOTAL      |
|--------|--------------|----------------|-------------|------------------|------------|
| 2      | SPAIN        | SPAIN          | 14          | 33               | 47         |
| 3      | ISRAEL       | REST OF WORLD  | 2           | 10               | 12         |
| 4      | USA          | REST OF WORLD  | 1           | 12               | 13         |
| 5      | ITALY        | OTHER MEDITERR | 11          | 11               | 22         |
| 7      | GREECE       | OTHER MEDITERR | 4           | 10               | 14         |
| 9      | ITALY        | OTHER MEDITERR | 0           | 19               | 19         |
| 12     | SPAIN        | SPAIN          | 6           | 18               | 24         |
| 16     | SOUTH AFRICA | REST OF WORLD  | 0           | 9                | 9          |
| 17     | TAIWAN       | REST OF WORLD  | 0           | 9                | 9          |
| 18     | SPAIN        | SPAIN          | 0           | 20               | 20         |
| 20     | SPAIN        | SPAIN          | 0           | 19               | 19         |
| 21     | SPAIN        | SPAIN          | 0           | 27               | 27         |
| 22     | SPAIN        | SPAIN          | 12          | 12               | 24         |
| 23     | ARGENTINA    | REST OF WORLD  | 1           | 9                | 10         |
| 24     | SPAIN        | SPAIN          | 2           | 26               | 28         |
| 25     | SPAIN        | SPAIN          | 0           | 26               | 26         |
| 26     | SPAIN        | SPAIN          | 0           | 14               | 14         |
| 27     | SPAIN        | SPAIN          | 0           | 4                | 4          |
| 28     | SPAIN        | SPAIN          | 0           | 26               | 26         |
| 31     | GREECE       | OTHER MEDITERR | 0           | 1                | 1          |
| 32     | CANADA       | REST OF WORLD  | 1           | 27               | 28         |
| 35     | SPAIN        | SPAIN          | 0           | 5                | 5          |
| 38     | TURKEY       | OTHER MEDITERR | 2           | 24               | 26         |
| 40     | GERMANY      | REST OF WORLD  | 0           | 16               | 16         |
| 42     | SPAIN        | SPAIN          | 0           | 17               | 17         |
| 43     | SPAIN        | SPAIN          | 7           | 22               | 29         |
| 45     | ITALY        | OTHER MEDITERR | 16          | 17               | 33         |
| 47     | GERMANY      | REST OF WORLD  | 0           | 17               | 17         |
| 49     | SPAIN        | SPAIN          | 7           | 29               | 36         |
| 51     | SPAIN        | SPAIN          | 6           | 20               | 26         |
|        |              | <b>TOTAL</b>   | <b>92</b>   | <b>509</b>       | <b>601</b> |

Supplementary Figure S4. Meta-regression analysis of mortality at Day 30 grouping by regions in the Targeted Therapy Cohort.

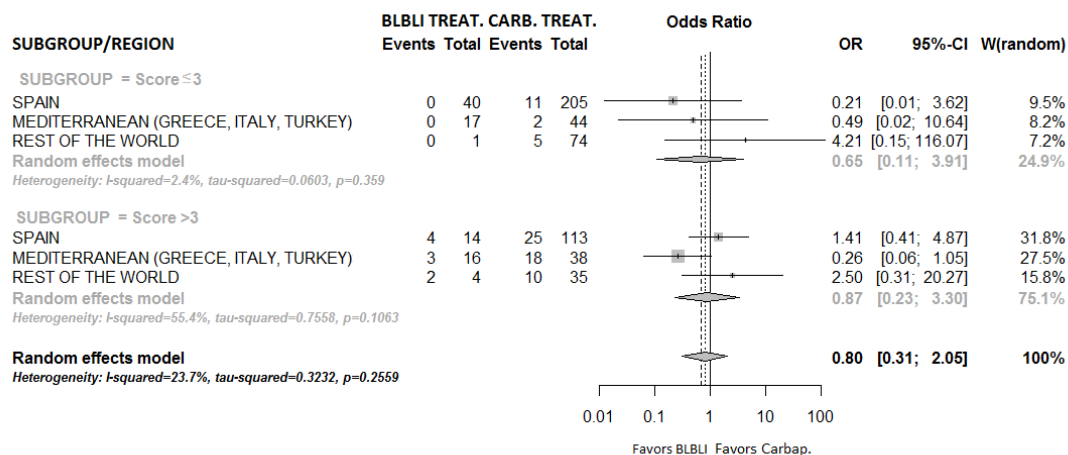

Supplementary Table S9. Features of patients matched according to the propensity score from the Targeted Therapy Cohort.

|                                  | <b>BLBLI<br/>(n=55)</b> | <b>Carbapenem<br/>(n=55)</b> | <b>p</b> |
|----------------------------------|-------------------------|------------------------------|----------|
| Age, median (IQR)                | 71 (55.5-81)            | 71 (63.5-78.5)               | 0.98     |
| Male sex                         | 29 (52.7)               | 36 (65.5)                    | 0.17     |
| Enterobacteriaceae               |                         |                              |          |
| <i>E. coli</i>                   | 43 (78.2)               | 40 (72.7)                    | 0.51     |
| <i>K. pneumoniae</i>             | 11 (20.0)               | 11 (20.0)                    | 1.00     |
| Others                           | 1 (1.8)                 | 4 (7.3)                      | 0.17     |
| Nosocomial acquisition           | 22 (40.0)               | 24 (43.6)                    | 0.70     |
| Source                           |                         |                              |          |
| Urinary tract                    | 27 (49.1)               | 22 (40.0)                    | 0.34     |
| Biliary tract                    | 6 (10.9)                | 10 (18.2)                    | 0.28     |
| Other                            | 22 <sup>c</sup> (40.0)  | 23 <sup>f</sup> (41.8)       | 0.85     |
| ICU admission                    | 4 (7.3)                 | 3 (5.5)                      | 0.70     |
| McCabe classification, non fatal | 23 (41.8)               | 26 (47.3)                    | 0.56     |
| Pitt score, median (IQR)         | 1 (0-2)                 | 0 (0-2)                      | 0.52     |
| Severe sepsis or shock           | 15 (27.3)               | 11 (20.0)                    | 0.37     |
| Cancer                           | 29 (52.7)               | 25 (45.5)                    | 0.45     |
| Empirical therapy                |                         |                              |          |
| Carbapenem                       | 4 (7.3)                 | 21 (38.2)                    | 0.0001   |
| BLBLI                            | 27 (49.1)               | 9 (16.4)                     | 0.0002   |
| Others                           | 24 (43.6)               | 25 (45.4)                    | 0.85     |
| Active empirical therapy         | 35 (63.6)               | 29 (54.7)                    | 0.35     |
| Cure/improvement                 | 49 (89.1)               | 46 (83.6)                    | 0.40     |
| 30-day mortality                 | 4 (7.3)                 | 9 (16.4)                     | 0.14     |

Supplementary Figure S5. Kaplan-Meier curves for mortality in targeted therapy propensity score-matched cohorts of patients treated with BLBLI versus carbapenems.

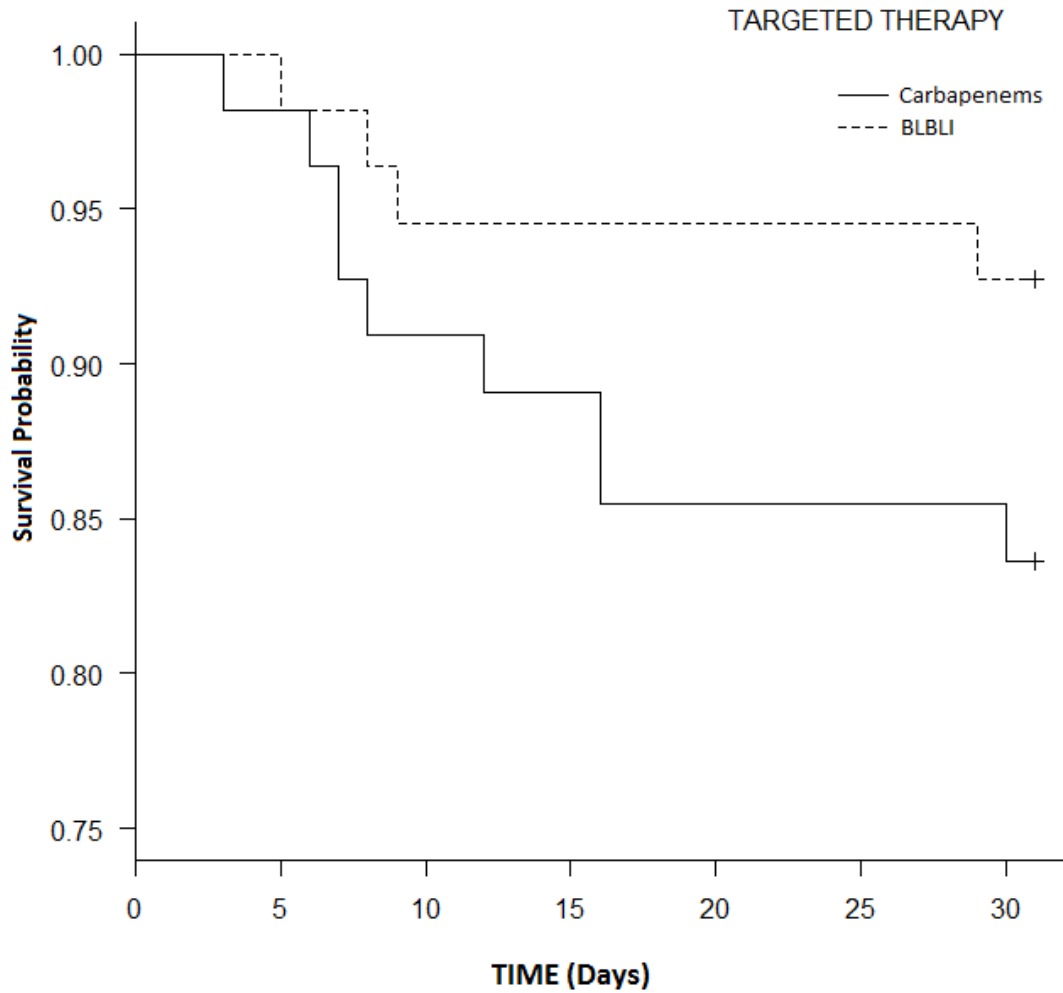

P= 0.14 (log-rank test)



Supplementary Table S10. Univariate analysis of the association between different variables and cure/improvement in the Global Therapy Cohort.

| Variable                         | Crude Analysis    |         |
|----------------------------------|-------------------|---------|
|                                  | OR (95% CI)       | p       |
| Age (per unit)                   | 0.99 (0.98-1.01)  | 0.48    |
| Male sex                         | 1.17 (0.74-1.85)  | 0.49    |
| Enterobacteriaceae               |                   |         |
| <i>E. coli</i>                   | Reference         |         |
| <i>K. pneumoniae</i>             | 0.55 (0.32-0.96)  | 0.03    |
| <i>Others</i>                    | 0.67 (0.31- 1.62) | 0.34    |
| Nosocomial acquisition           | 0.60 (0.38-0.95)  | 0.03    |
| Source                           |                   |         |
| Urinary tract                    | Reference         |         |
| Biliary tract                    | 0.57 (0.28-1.20)  | 0.13    |
| Others (high risk source)        | 0.37 (0.21- 0.62) | 0.0002  |
| ICU admission                    | 0.37 (0.21- 0.69) | 0.001   |
| McCabe classification, non fatal | 4.26 (2.53- 7.50) | <0.0001 |
| Pitt score, per unit             | 0.75 (0.69- 0.82) | <0.0001 |
| Severe sepsis or shock           | 0.17 (0.10-0.28)  | <0.0001 |
| Appropriate empirical therapy    | 0.17 (0.72-1.87)  | 0.52    |
| Empirical-Targeted therapy       |                   |         |
| Carbapenem-Carbapenem            | Reference         |         |
| BLBLI-Carbapenem                 | 0.82 (0.42- 1.58) | 0.55    |
| BLBLI-BLBLI                      | 0.95 (0.40- 2.42) | 0.92    |
| Others-Carbapenem                | 0.78 (0.42-1.41)  | 0.42    |
| Others-BLBLI                     | 1.29 (0.4-5.77)   | 0.69    |
| Propensity score                 | 1.41 (0.66-3.20)  | 0.39    |

Supplementary Table S11. Univariate analysis of the association between different variables and 30-day mortality in the Global Therapy Cohort.

| Variable                           | Crude Analysis    |         |
|------------------------------------|-------------------|---------|
|                                    | OR (95% CI)       | p       |
| Age (per unit)                     | 1.023 (1.01-1.04) | 0.004   |
| Male sex                           | 1.19 (0.74-1.94)  | 0.47    |
| Enterobacteriaceae                 |                   |         |
| <i>E. coli</i>                     | Reference         |         |
| <i>K. pneumoniae</i>               | 2.17 (1.25-3.69)  | 0.005   |
| <i>Others</i>                      | 1.68 (0.70-3.64)  | 0.21    |
| Nosocomial acquisition             | 1.38 (0.86-2.21)  | 0.18    |
| Source                             |                   |         |
| Urinary tract                      | Reference         |         |
| Biliary tract                      | 1.29 (0.57-2.75)  | 0.51    |
| Others (high risk source)          | 2.54 (1.52-4.35)  | 0.0005  |
| ICU admission                      | 2.95 (1.58- 5.31) | 0.0004  |
| McCabe classification, non fatal   | 0.20 (0.11-0.35)  | <0.0001 |
| Pitt score, per unit               | 1.34 (1.23-1.47)  | <0.0001 |
| Severe sepsis or shock             | 6.82 (4.1-11.74)  | <0.0001 |
| Appropriate empirical therapy      | 0.71 (0.44-1.15)  | 0.16    |
| Empirical therapy continued in D.T | 0.89 (0.50- 1.51) | 0.67    |
| Empirical Therapy-Targeted Therapy |                   |         |
| Carbapenem- Carbapenem             | Ref               |         |
| BLBLI- Carbapenem                  | 1.17 (0.58- 2.36) | 0.66    |
| BLBLI- BLBLI                       | 1.19 (0.46- 2.84) | 0.71    |
| Others- Carbapenem                 | 1.51 (0.82-2.86)  | 0.20    |
| Others- BLBLI                      | 0.56 (0.09-2.11)  | 0.46    |
| Propensity score                   | 0.44 (0.18-1.00)  | 0.06    |
